# Supplementary material
Source: Springer Nature journal article supplement (https://www.springermedizin.de/resource/supplementary/12885_2010_2755_MOESM3_ESM.pdf/9461926)

## Distribution of functional families

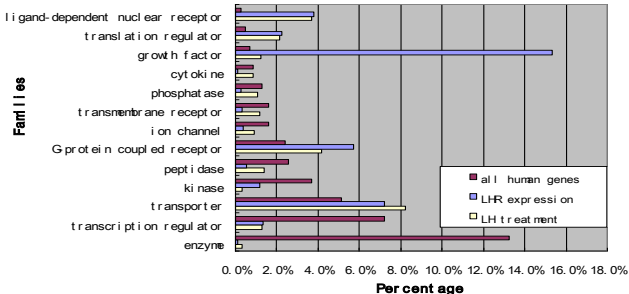

Supplement: MOESM3 [file 9461926]
